# Supplementary material for: Long Reads de novo sequencing of the Anas diazi genome reveals changes in gene orthology in waterfowl
Source: Research Square preprint supplement (doi:10.21203/rs.3.rs-8736544/v1), 2026-02-18
Supplement: Supplementary file 1 [file 7708174c24f378399324919d.xlsx]

## Sheet: Hoja1
Formula: y_transform ~ x^transform_exp * length * predict2_0(r1, k, d, kmercov, bias, x)
Parameters:
Estimate Std. Error t value Pr(>|t|)
d 1.147e-02 6.478e-04 17.70 <2e-16 ***
r1 1.082e-02 5.561e-05 194.59 <2e-16 ***
kmercov 7.722e+00 4.551e-03 1696.56 <2e-16 ***
bias 2.107e-01 4.727e-03 44.57 <2e-16 ***
length 9.544e+08 9.696e+05 984.35 <2e-16 ***
Signif. codes: 0 ‘***’ 0.001 ‘**’ 0.01 ‘*’ 0.05 ‘.’ 0.1 ‘ ’ 1
Residual standard error: 2584000 on 243 degrees of freedom
Number of iterations to convergence: 5
Achieved convergence tolerance: 1.49e-08
