# Supplementary material for: Long Reads de novo sequencing of the Anas diazi genome reveals changes in gene orthology in waterfowl
Source: Research Square preprint supplement (doi:10.21203/rs.3.rs-8736544/v1), 2026-02-18
Supplement: Supplementary file 2 [file 8b5e7be699bb019685168338.xlsx]

## Sheet: Hoja1
Statistics without reference	pato_1_fasta
# contigs	4570
# contigs (>= 0 bp)	4570
# contigs (>= 1000 bp)	4570
Largest contig	3234602
Total length	1058566110
Total length (>= 0 bp)	1058566110
Total length (>= 1000 bp)	1058566110
N50	485801
N90	97777
auN	661605
L50	601
L90	2466
GC (%)	41.55
Per base quality
# N's per 100 kbp	0
# N's	0
Alignment-based statistics
NG50	410135
auNG	583627
LG50	759
