# Supplementary material for: Long Reads de novo sequencing of the Anas diazi genome reveals changes in gene orthology in waterfowl
Source: Research Square preprint supplement (doi:10.21203/rs.3.rs-8736544/v1), 2026-02-18
Supplement: Supplementary file 3 [file b1e07a6308a06d0165bd893e.xlsx]

## Sheet: Hoja1
GenomeScope version 2.0
p = 2
k = 21
property	min	max
Homozygous (aa)	0.9891	0.9893
Heterozygous (ab)	0.0107	0.0109
Genome Haploid Length	1,017,679,845 bp	1,020,082,072 bp
Genome Repeat Length	75,486,929 bp	75,665,115 bp
Genome Unique Length	942,192,917 bp	944,416,957 bp
Model Fit	0.9627	0.9965
Read Error Rate	0.0003	0.0003
