# Supplementary material for: Long Reads de novo sequencing of the Anas diazi genome reveals changes in gene orthology in waterfowl
Source: Research Square preprint supplement (doi:10.21203/rs.3.rs-8736544/v1), 2026-02-18
Supplement: Supplementary file 4 [file bae117f119b68ba36281187b.xlsx]

## Sheet: Hoja1
Species	Expansions	Contractions
Anas_diazi	6	45
Anas_platyrhynchos	132	1
Aix_galericulata	149	0*
Anser_cygnoides	79	6
Gallus_gallus	118	9
